1 Recovering high-quality host genomes from gut metagenomic data  
2 through genotype imputation

3 Sofia Marcos <sup>1\*</sup>, Melanie Parejo <sup>1</sup>, Andone Estonba <sup>1</sup>, and Antton Alberdi <sup>2\*</sup>

4

5 <sup>1</sup> Applied Genomics and Bioinformatics, University of the Basque Country (UPV/EHU), Leioa,  
6 Bilbao, Spain.

7 <sup>2</sup> Center for Evolutionary Hologenomics, GLOBE Institute, University of Copenhagen,  
8 Copenhagen, Denmark.

9

10 \* Corresponding authors

11 E-mail: sofia.marcos@ehu.eus (SM), antton.alberdi@sund.ku.dk (AA).

12

## 13 **Abstract**

14 Metagenomic data sets of host-associated microbial communities often contain host DNA that is  
15 usually discarded because the amount of data is too low for accurate host genetic analyses.  
16 However, if a reference panel is available, genotype imputation can be employed to reconstruct  
17 host genotypes and maximise the use of such a priori useless data. We tested the performance of  
18 a two-step strategy to input genotypes from four types of reference panels, comprised of deeply  
19 sequenced chickens to low-depth host genome (~2x coverage) data recovered from metagenomic  
20 samples of chicken intestines. The target chicken population was formed by two broiler breeds  
21 and the four reference panels employed were (i) an internal panel formed by population-specific  
22 individuals, (ii) an external panel created from a public database, (iii) a combined panel of the  
23 previous two, and (iv) a diverse panel including more distant populations. Imputation accuracy was  
24 high for all tested panels (concordance >0.90), although samples with coverage under 0.28x  
25 consistently showed the lowest accuracies. The best imputation performance was achieved by the  
26 combined panel due to the high number of imputed variants, including low-frequency ones.  
27 However, common population genetics parameters measured to characterise the chicken  
28 populations, including observed heterozygosity, nucleotide diversity, pairwise distances and  
29 kinship, were only minimally affected by panel choice, with all four panels yielding suitable results  
30 for host population characterization and comparison. Likewise, genome scans between the two  
31 studied broiler breeds using imputed data with each panel consistently identified the same sweep  
32 regions. In conclusion, we show that the applied imputation strategy enables leveraging insofar  
33 discarded host DNA to get insights into the genetic structure of host populations, and in doing so,  
34 facilitate the implementation of hologenomic approaches that jointly analyse host genomic and  
35 microbial metagenomic data.

## 36 **Author summary**

37 We introduce and assess a methodological approach that enables recovering animal genomes  
38 from complex mixtures of metagenomic data, and thus expand the portfolio of analyses that can  
39 be conducted from samples such as faeces and gut contents. Metagenomic data sets of host-

40 associated microbial communities often contain DNA of the host organism. The principal drawback  
41 to use this data for host genomic characterisation is the low percentage and quality of the host  
42 DNA. In order to leverage this data, we propose a two-step imputation method, to recover high-  
43 density of variants. We tested the pipeline in a chicken metagenomic dataset, validated imputation  
44 accuracy statistics, and studied common population genetics parameters to assess how these are  
45 affected by genotype imputation and choice of reference panel. Being able to analyse both  
46 domains from the same data set could considerably reduce sampling and laboratory efforts and  
47 resources, thereby yielding more sustainable practices for future studies that embrace a  
48 hologenomic approach that jointly analyses animal genomic and microbial metagenomic features.

## 49 **Introduction**

50 The large molecular data sets generated through shotgun DNA sequencing usually contain useful  
51 information to characterise taxa, functions and structures beyond the primary aim of the study.  
52 This is especially true in metagenomic data sets that often present mixtures of DNA from  
53 eukaryotic, prokaryotic and viral origin (1,2). While primarily used for characterising the genomic  
54 architecture of microbial communities, metagenomic data generated from gut contents or faeces  
55 can also be used for extracting useful genomic information of the animal host (3). In fact,  
56 hologenomic approaches that entail joint analysis of animal genomes along with metagenomes of  
57 associated microorganisms to study animal-microbiota interactions, can benefit from such  
58 optimisation strategies (4,5).

59 However, mining host genomic data from metagenomic data sets entails a number of challenges.  
60 The fraction of host sequences in the metagenomic mixture is often unpredictable, and can range  
61 from a negligible proportion (<5%) to an almost complete representation (>95%) of the sample (6),  
62 even within a single taxon and sample type (7). Hence, a given amount of metagenomic  
63 sequencing effort does not ensure that the desired depth of host DNA sequencing will be reached.  
64 When the host DNA fraction in the metagenomic mixture is low, achieving the desired sequencing  
65 depth requires increasing sequencing effort, with its respective economic burden. In consequence,  
66 the amount of host DNA sequences generated is often insufficient for accurate variant calling.

67 One useful strategy for efficient data mining of host genomic information from metagenomic  
68 mixtures is genotype imputation, which consists in estimating missing haplotypes of poorly  
69 characterised genomes using a reference panel of high-quality genotypes (8). Using this approach,  
70 the information gaps of genomes with very low sequencing depth can be reconstructed based on  
71 the haplotype information of a properly characterised representative panel of genomes. Genotype  
72 imputation of single nucleotide polymorphisms (SNPs) is a widely employed approach in  
73 association studies to increase the density of variants of genomic data sets (9–11). In model  
74 organisms, the recent generation of large high-quality genomic databases, such as the human  
75 1000 Genomes Project (12) and the 1000 Bull Genomes Project (13), has improved the accuracy  
76 of imputation and increased the statistical power of association analyses, especially for rare  
77 variants (14,15). However, ideal reference panels are only available for a limited number of model  
78 and farm species, and they also require high computational capacity.

79 When large reference panels are not available for small or isolated populations, an alternative  
80 strategy is to create a custom panel using a representative subset of genomes of the studied  
81 population (16,17). Due to its lower computational requirements, this approach can be more cost-  
82 efficient when studying closely related individuals, such as chickens from a given hatchery. This is  
83 because when haplotype diversity is limited, genomic information of a subset of the population can  
84 efficiently input haplotype information to the rest of the population. Moreover, the study-specific  
85 panel can be combined with individuals from public databases (16,17). This approach has been  
86 successfully employed in sheep (18), pig (19) and chicken (20) studies, for example.

87 Nevertheless, in addition to the size and diversity of the panel (21), imputation strategy may also  
88 affect the accuracy of recovered genotypes (22). In contrast to the standard imputation method, in  
89 which low density SNP arrays are imputed to high density based on a reference panel, shallow  
90 shotgun sequenced data displays particular challenges, as no genotype is known with certainty  
91 and SNPs may be distributed unevenly. Recently, a two-step imputation strategy for ultra low-  
92 depth coverage samples (<1x) was introduced (23). This approach relies on updating genotype  
93 likelihoods before imputing the missing genotypes using a reference panel in order to recover a  
94 higher density of SNPs with greater confidence. It was first proposed in human population genetics

95 as an alternative to genotyping arrays for genome-wide association studies (23), and later applied  
96 to recover ancient human genomes (24). To the best of our knowledge, such a two-step imputation  
97 strategy has not been implemented yet in non-model animal populations with variable coverage  
98 and a limited number of available samples as a reference panel. Hence, there are no specific  
99 recommendations about the bioinformatic procedures for host genome recovery from  
100 metagenomic data sets and the choice of the most optimal panel to maximise accuracy of the  
101 imputation process. We also ignore how the choice of a custom reference panel could determine  
102 downstream analyses, such as measuring population genetics parameters.

103 Here, we present a straightforward approach to recover high-quality host genomes from gut  
104 metagenomic data, showcased in two broiler chicken breeds. We evaluate how the reference  
105 panel composition and sample depth of coverage affects imputation performance using four panels  
106 designed according to the resources scientists studying microbial metagenomics may have access  
107 to. We first calculate imputation accuracy between imputed and true genotypes in three  
108 chromosomes using 12 validation samples for which high-depth sequencing data is also available.  
109 Then, we employ a bigger data set of 100 individuals to impute all autosomal chromosomes and  
110 explore how the choice of the reference panel affects parameters commonly used in population  
111 genetics. Aiming at facilitating its implementation by other researchers, we provide the  
112 bioinformatic pipeline and guidelines for the choice of the most suitable panel and minimal depth  
113 threshold for a successful imputation.

## 114 **Methods**

### 115 **Ethical statement**

116 Animal experiments were performed at IRTA's experimentation facilities in Tarragona under the  
117 permit FUE-2018-00813123 issued by the Government of Catalonia, in compliance with the  
118 Spanish Royal Decree on Animal Experimentation RD53/2013 and the European Union Directive  
119 2010/63/EU about the protection of animals used in the experimentation.

## 120 **Target population and reference panels**

121 Our study design involved genotype imputation from four reference panels with different origins  
122 and genetic features to a target chicken population characterised through low genomic coverage  
123 from intestinal metagenomic data.

### 124 **Target population**

125 Genomic information of the target population of 100 chickens belonging to two broiler breeds (Ross  
126 308 and Cobb 500, hereafter simply Ross and Cobb) was generated from metagenomic DNA  
127 extracted from the caecum contents of the birds. In short, ca. 100 mg of caecum content was  
128 collected right after euthanizing the animals and preserved in E-matrix tubes with DNA/RNA Shield  
129 buffer (Zymo Research, Cat. No. BioSite-R1200-125) at -20 °C until extraction. After physical cell  
130 disruption through bead-beating using a TissueLyser II machine (Qiagen, Cat. No. 85300), DNA  
131 extraction was performed using a custom nucleic acid extraction protocol (details explained in  
132 (25)), and sequencing libraries were prepared using the adapter ligation-based BEST protocol  
133 (26). Paired-end 150 bp-long reads were generated on a MGISEQ-2000 sequencing platform over  
134 multiple sequencing lanes. Sequencing effort was decided based on the desired depth of the  
135 metagenomic fraction of the samples, which was the primary objective of the data generation. A  
136 preliminary screening revealed that caecum contents contain a large fraction of microbial DNA  
137 (>80-95%), and a limited relative amount of host DNA (< 5-15%) (Fig 1A). Aiming at about 15 GB  
138 (gigabases, ca. 50 million reads) of bacterial DNA per sample, caecum samples yielded between  
139 0.5 and 4 GB of host DNA, which is equivalent to 0.5-4x depth of coverage of the chicken genome  
140 (~1.05 GB).

141

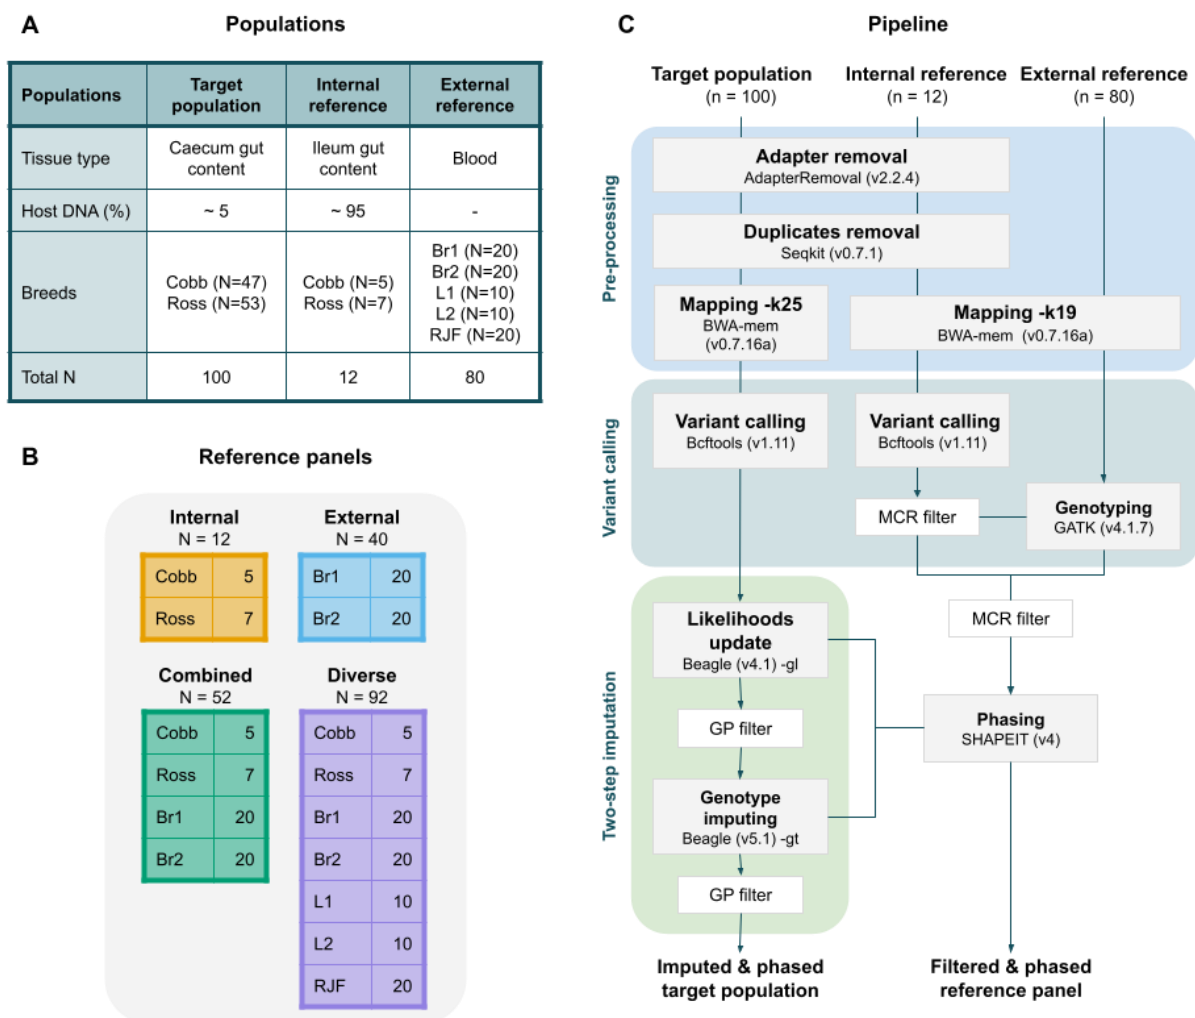

142

143 **Fig 1. Study design and imputation pipeline for recovering host DNA.**

144 (A) The characteristics of the three data sets. (B) Composition and number of samples of the four  
 145 reference panels used for imputation. Breeds are coded as Br1 = broiler line A, Br2 = broiler line  
 146 B, L1 = white layer, L2 = brown layer, RJF= red junglefowl. (C) The study design has three data  
 147 sets: the target population, internal reference and external reference samples. The bioinformatic  
 148 procedure is divided into three steps: pre-processing, variant calling, and imputation. The input  
 149 format of the starting step is a FASTQ file. After mapping we obtain a BAM file and from variant  
 150 calling to the final step, procedures are performed using VCF file. The green box represents the  
 151 steps proposed by Hui et al. (2020). Genotype probability (GP) filters are used during imputation  
 152 and missing call rate (MCR) filters during panel design.

## 153 **Reference samples**

154 Internal and external high-quality genome sequence data was used to create the reference panels.  
155 The internal reference data were generated from ileum content samples of 12 randomly selected  
156 individuals included in the target population (7 Ross and 5 Cobb), following the same procedures  
157 as explained above. In contrast to caecum samples, ileum contents contain a very large fraction  
158 (>90-95%) of host DNA, and a small representation of microbial DNA. Hence, in order to generate  
159 a comparable amount of microbial data to that of the caecum, ileum samples were sequenced  
160 aiming 100 GB/sample. This sequencing effort yielded about 90 GB of host DNA (ca. 80-90x depth  
161 of chicken genome), which enabled generating a high-quality internal reference panel from a  
162 subset of the studied population. In addition, chicken DNA sequence data of 40 broilers, 20 layers  
163 and 20 red junglefowls (RJF) generated by Qanbari et al. (2019) from blood samples were used  
164 as external reference data (Fig 1A).

## 165 **Composition of reference panels**

166 We used different combinations of the internal and external reference samples to create the four  
167 reference panels used to evaluate imputation accuracy and impute the target population: (i) The  
168 internal panel comprised 12 animals from our target population (7 Ross and 5 Cobb), (ii) the  
169 external panel comprised 40 animals from two broiler breeds (different to our target population),  
170 (iii) the combined panel combined the previous two panels, and (iv) the diverse panel contained  
171 more distant populations (Fig 1B). The four panels varied in size and genomic diversity in order to  
172 see whether the composition of the reference panels affected imputation accuracy. With the  
173 internal panel, we tested if a small subset of the target population was enough for a proper  
174 imputation in low-quality host sequence data derived from metagenomic samples. The use of an  
175 external panel only was considered to test if it was a viable option for studies with a shortage of  
176 samples or a limited budget for high-depth host sequencing. The combined panel, on the other  
177 hand, permits combining both resources, the study-specific and database samples. Lastly, the  
178 diverse panel enabled us to test whether including distantly related individuals would be more  
179 effective than the three previously mentioned strategies.



## 180 **Pipeline for recovering host genotypes from metagenomic** 181 **data**

### 182 **Data pre-processing**

183 All the metagenomic sequence data we generated, which contained both host and microbial DNA,  
184 were pre-processed using identical bioinformatic procedures. In short, sequencing adapters were  
185 removed using AdapterRemoval (v2.2.4) (27) and exact duplicates using seqkit rmdup (v0.7.1)  
186 (28) prior to the read-mapping. Read-alignment to the chicken reference genome (galGal6; NCBI  
187 Assembly accession GCF\_000002315.6) was conducted with BWA-MEM (v0.7.16a) (29). We  
188 employed default parameters except for the minimum seed length (-k), which was increased to 25  
189 in order to reduce the number of incorrectly aligned read pairs. We added the flag -M, which was  
190 used to mark shorter split hits as secondary mappings. Aligned reads were sorted and converted  
191 into sample-specific BAM files before filtering out the metagenomic fraction (unmapped) using  
192 SAMtools view (v1.11) (30) with “-b” and “-F12” flags. Mapping statistics including depth and  
193 breadth of coverage as well as percentage of mapped reads were calculated using SAMtools’  
194 depth and flagstat functions.

195 Pure genomic data (with no microbial fraction) generated by others (31) was downloaded from the  
196 EMBL-EBI ENA database, and mapped to the same chicken reference genome using BWA-MEM  
197 with -k default value and -M flag.

### 198 **Variant calling and genotyping**

199 Variants in the target population were called by chromosome with the mpileup utility of SAMtools  
200 using standard parameters (-C 50 -q 30 -Q 20). Variant calling was performed with “-m” and “-v”  
201 flags to allow variants to be called on all samples simultaneously. Raw variants were filtered using  
202 BCFtools (v. 1.11) (32) commands “-m2”, “-M2” and “-v snps” to keep only bi-allelic SNPs.

203 Variants of the internal reference samples were called the same way, but additionally, low quality  
204 variants with a lower base quality than 30 ( $QUAL < 30$ ) and variants with a base depth higher than  
205 three times the average ( $DP < (AVG(DP) * 3)$ ) were removed to ensure only highly reliable variants  
206 were retained.

207

208 Since we were solely interested in imputing variants present in our target population, the external  
209 reference samples were genotyped by defining variant sites detected in the internal reference  
210 samples. Genotyping was performed for all autosomal chromosomes with GATK (v4.1.7.0) (33)  
211 HaplotypeCaller using the “--min-base-quality-score 20”, “--standard-min-confidence-threshold-  
212 for-calling 30”, “--alleles” and “-L” parameters to obtain calls at all given positions, followed by  
213 GATK SelectVariants “--select-type-to-include SNP” to only include SNPs.

214 In preliminary analyses, we also called variants in the external reference panel in order to examine  
215 the overlap with the variants present in the internal reference samples. We used the same  
216 procedures explained above for GGA1. Genotyping based on the positions of the internal panel  
217 and variant calling from scratch were compared by using the 40 broilers from the external reference  
218 panel for GGA1 (Fig 1B). A similar number of variants had been obtained for the genotyped (2.5  
219 M) and the variant called VCF files (2.7 M). Moreover, 28% of the variants from the 40 broilers  
220 were not present in the internal reference samples (Fig S2). Thus, we decided to genotype the rest  
221 of the samples to reduce possible bias through the high number of variants specific to the external  
222 reference for the imputation of our target population.

## 223 **Two-step imputation via genotype likelihood updates**

224 We imputed genotypes from the four aforementioned reference panels to the target population  
225 using a two-step strategy. Prior to imputation, the reference panels were filtered by excluding  
226 variants with missing genotypes to remove any potential noise caused by inference errors, and  
227 subsequently phased using SHAPEIT (v4) (34).

228 Imputation was performed in two steps following Homberg et al. (2019) and Hui et al. (2020). First,  
229 genotype likelihoods were updated based on one of the reference panels using Beagle 4.1 (35).  
230 Beagle 4.1 accepts a probabilistic genotype input with “-gl” mode, and it only updates sites that  
231 are present in the input file. Second, missing genotypes in the input file were imputed using Beagle  
232 5.1 with “-gt” mode using the same reference panel. Beagle 5.1 only accepts files with a genotype  
233 format field, like later versions than Beagle 4.1. Therefore, the latest version cannot be used for  
234 both steps. Format field genotype probabilities (GP) were generated in both steps in order to enrich  
235 confident genotypes. We required the highest GP to exceed a threshold of 0.99 after both steps  
236 using BCFtools +setGT plugin. The rest of the parameters were set to default. Both steps’ input  
237 and output files were in VCF format. The schematic steps detailed in methods can be found in Fig  
238 1C and the scripts in the following link (<https://github.com/SofiMarcos/Host-genome-recovery.git>).

## 239 **Imputation accuracy using 12 validation samples**

240 The accuracy of the imputation using the four reference panels was tested using the 12 individuals  
241 for which we generated both low-depth (target population) and high-depth (internal reference  
242 samples) sequence data from caecum and ileum contents, respectively, hereafter referred to as  
243 validation samples. The low-depth samples of the 12 individuals had a depth of coverage spanning  
244 0.05x to 3.73x. For an unbiased evaluation, we employed a leave-one-out cross-validation  
245 (LOOCV) approach by excluding each of the 12 validation samples once from the reference panel  
246 in each of the different imputation scenarios. Considering the large size-variation of avian  
247 chromosomes, a macrochromosome (GGA1, 197.6 MB), a mid-size chromosome (GGA7, 36.7  
248 MB) and a microchromosome (GGA20, 13.9 MB) were selected for the test to optimise runtime  
249 and computational resources. Concordance between the internal reference samples and imputed  
250 genotypes was calculated for each individual chicken using VCFtools, with the “--diff-discordance-  
251 matrix” option. Precision of heterozygous sites was also calculated, since these alleles are the  
252 most difficult to impute correctly. Kruskal-Wallis test was performed to test for differences across  
253 chromosomes. A paired sample T-test and F-test were performed for both parameters to verify if  
254 the difference in means and variances were significant between reference panels. T-test p-values

255 were adjusted using Bonferrini's correction method. Moreover, imputation accuracy was estimated  
256 for variants in different minor allele frequency (MAF) bins to evaluate whether rare and common  
257 variants are equally correctly imputed. We thus extracted variant frequencies from the internal  
258 panel by analysing precision of heterozygous (het.) sites for the GGA1 in bins of 0-0.05, 0.05-0.1,  
259 0.1-0.3 and >0.3.

## 260 **Impact of reference panel on population genetics inference**

261 We explored the implications of using different reference panels in downstream analyses of  
262 population genetic inferences, including population structure, genetic diversity, and genome scans  
263 for signatures of selection.

264 These analyses were run in all but two outlier samples with depths of coverage of 0.07x and 0.05x,  
265 which were below the threshold of 0.28x corresponding to the lowest successfully imputed sample  
266 in the validation set (genotype concordance of >0.90 and het. sites precision of >0.75, see results  
267 below). We thus used 100 samples (53 Ross and 47 Cobb) for which we ran the host DNA recovery  
268 pipeline for all the autosomal chromosomes and analysed common population genetics  
269 parameters including observed heterozygosity (O.Het), nucleotide diversity ( $\pi$ ), pairwise distance  
270 as estimated through identity-by-state (1-IBS) and kinship. The same analyses were also  
271 conducted for 10 validation samples (for the low-depth and high-depth samples) after excluding  
272 two of them, whose respective counterparts in the target populations (with 0.05 and 0.07x depth)  
273 were filtered out. The imputed data sets with each of the panels were filtered for missingness 0  
274 with PLINK (v1.9) (36).

275 For measuring population genetics parameters, the VCF files were filtered for MAF >0.05. O.Het  
276 was calculated for each individual using the command "--het" in PLINK (v1.9).  $\pi$  was calculated in  
277 40 kb windows with 20 kb step size across autosomal chromosomes using VCFtools. For the  
278 validation samples whole-genome windowed values were averaged to generate a genome-wide  $\pi$   
279 for each individual. For the target population,  $\pi$  was calculated for each breed population. Paired  
280 sample T-tests were performed for O.Het and  $\pi$  parameters. Pairwise distance was calculated

281 using “--distance square 1-ibs” in PLINK (v1.9). Kinship was calculated with the command “--make-  
282 king square” using PLINK (v2). To test the correlation between the resulting matrices from the  
283 pairwise distance and kinship analyses using different panels, a Mantel test was performed with  
284 the R package *ade4* (37).

285 We further tested whether genome scans for selection between the Cobb and Ross population  
286 with each of the imputed datasets yielded consistent results. To this end, we calculated population  
287 differentiation along the genome using fixation index (FST) between both breeds using each panel.  
288 FST was calculated in sliding windows of 40 kb with 20 kb overlap across autosomal  
289 chromosomes. Window-based FST values were then normalised, and regions with values above  
290 the 99th and 99.9th percentile were considered as putative selective sweep regions (38). The  
291 overlap of these regions across the datasets using the different reference panels were used as an  
292 estimate of consistency.

## 293 **Results**

### 294 **Alignment and coverage**

295 The mapping statistics of the 100 samples used to characterise the target population (caecum  
296 content) and the 12 internal reference samples (ileum content) were drastically different. Caecum  
297 samples showed an average of  $1.84 \pm 2.35x$  (mean $\pm$ SD) depth of coverage and  $52.41 \pm 24.20\%$  of  
298 breadth of coverage. Ileum samples had  $92.70 \pm 7.64\%$  of host DNA and an average depth of  
299  $93.16 \pm 9.07x$ , practically covering the entire reference genome ( $98.89 \pm 0.01\%$ ).

### 300 **Pipeline fitting**

301 The pipeline required some tests and adjustments to optimise it to our system. The standard  
302 alignment (seed length 19) presented an unconventional distribution of reads across the genome,  
303 i.e. unspecified read mapping leading to regions being stacked with 80+ reads (Table S1). In order  
304 to remove as many remaining microbial reads as possible, we increased the seed length to 25.

305 Standard deviation of the depth of coverage decreased considerably (from 202.79 to 3.66), while  
306 the mean depth decreased from 2.78x to 1.73x. The breadth of coverage decreased by 9% (Fig  
307 S1).

## 308 **Imputation accuracy of 12 validation samples**

309 The internal (n=12), external (n=40), combined (n=52) and diverse (n=92) reference panels were  
310 used to study (i) the effect of panel size and diversity and (ii) sample depth of coverage threshold  
311 on imputation accuracy in three chromosomes with contrasting dimensions. Variant calling in the  
312 internal reference samples detected 2.4 M, 470 K and 182 K putative SNPs in chromosomes  
313 GGA1, GGA7 and GGA20, respectively. After genotyping the external reference samples and  
314 combining them to create the external, combined and diverse panels, each panel was filtered  
315 before being phased. As a consequence, the filtering step decreased the number of SNPs by  
316  $13.83 \pm 1.36\%$  for the external and combined, and by  $23.80 \pm 0.99\%$  for the diverse panel, which  
317 yielded panels with different numbers of SNPs (Fig 2A). More than 96% of the total SNPs in each  
318 panel successfully passed the multiple filters of the pipeline, even for samples with less than 1x  
319 coverage (Fig 2B). Furthermore, the proportion of imputed SNPs increased and gained uniformity  
320 across samples when the panel was larger but had fewer SNPs. The mean number of imputed  
321 SNPs across samples differed between all the panels: internal vs external ( $t=14.58$ ,  $p\text{-value} <$   
322  $0.001$ ), external vs combined ( $t=13.56$ ,  $p\text{-value} < 0.001$ ) and combined vs diverse ( $t=11.63$ ,  $p\text{-}$   
323  $\text{value} < 0.001$ ). The F-test to compare variances was significant only between the diverse and the  
324 rest of the panels: internal vs diverse ( $F= 30.54$ ,  $p\text{-value} < 0.001$ ), external vs diverse ( $F=24.24$ ,  $p\text{-}$   
325  $\text{value} < 0.001$ ) and combined vs diverse ( $F= 11.31$ ,  $p\text{-value} < 0.001$ ). Results indicate that the  
326 variance across samples for the diverse panel greatly decreased compared to the rest of the  
327 panels (Fig 2B).

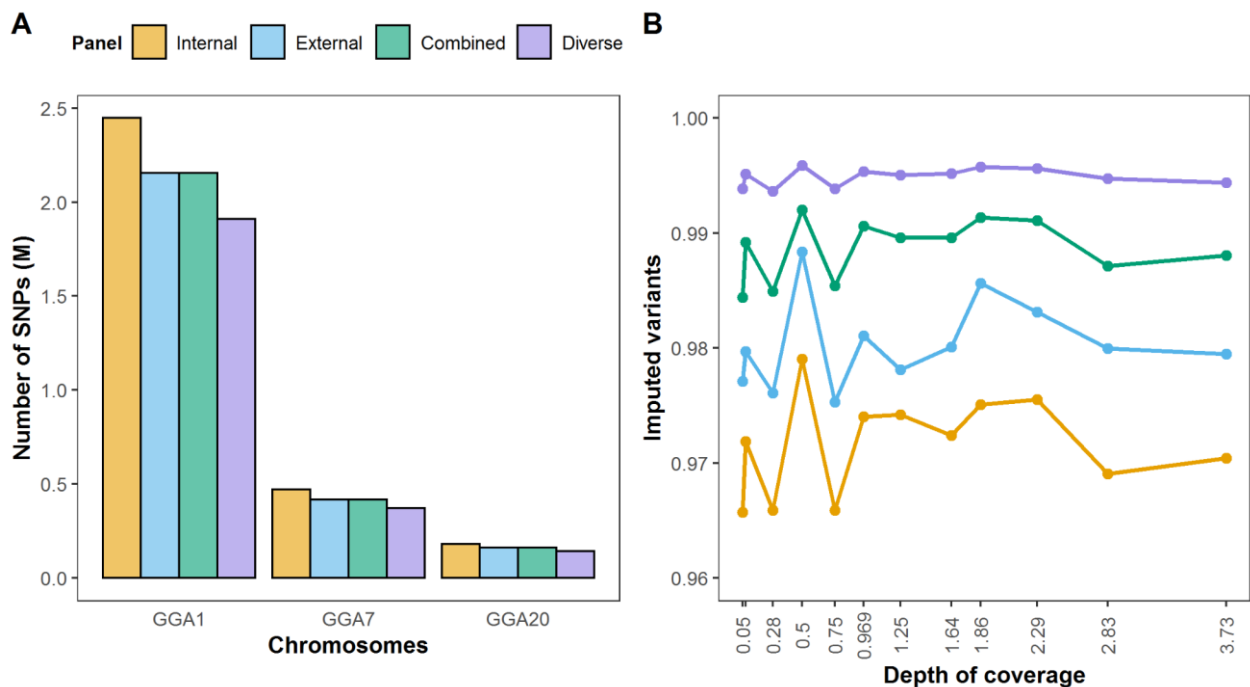

328

329 **Fig 2. Imputation statistics.**

330 (A) Number of SNPs in each reference panel for chromosomes GGA1, GGA7, GGA20. (B) Depth  
 331 of coverage and proportion of successfully imputed variants of the 12 validation samples for the  
 332 three chromosomes tested. Capitalised letters refer to panel names: I=internal, E=external,  
 333 C=combined and D=diverse.

334

335 For each imputation scenario, genotype concordance and precision of het. sites were assessed in  
 336 the 12 validation samples by comparing imputed and true genotypes per individual. Depth of  
 337 coverage of low-depth samples ranged from 0.05x to 3.5x, and breadth of coverage from 10% to  
 338 80%. After performing LOOCV with the four reference panels, average values of genotype  
 339 concordance for the 12 validation samples exceeded 0.90 for every panel (Fig 3A) and precision  
 340 of het. sites ranged from 0.78 to 0.91 (Fig 3B). According to Kruskal Wallis tests, the values of  
 341 concordance ( $p\text{-value}_{\text{internal}} > 0.85$ ,  $p\text{-value}_{\text{external}} > 0.85$ ,  $p\text{-value}_{\text{combined}} > 0.95$  and  $p\text{-value}_{\text{diverse}} >$   
 342  $0.95$ ) and precision of het. sites ( $p\text{-value}_{\text{internal}} > 0.95$ ,  $p\text{-value}_{\text{external}} > 0.85$ ,  $p\text{-value}_{\text{combined}} > 0.85$   
 343 and  $p\text{-value}_{\text{diverse}} > 0.85$ ) did not differ across chromosomes. However, mean values differed  
 344 between panels for each chromosome (Fig 3). Concordance values significantly differed when  
 345 comparing the internal, external and combined panels (Fig 3A). But no differences were detected

346 between the combined and the diverse panels, indicating that no significant increase in imputation  
347 accuracy can be achieved in terms of overall concordance by adding more distant individuals. For  
348 precision of het. sites, differences were detected for all panels (Fig 3B), including for the combined  
349 and the diverse except for GGA20. This suggests that the heterozygous positions are the most  
350 sensitive to the imputation process.

351

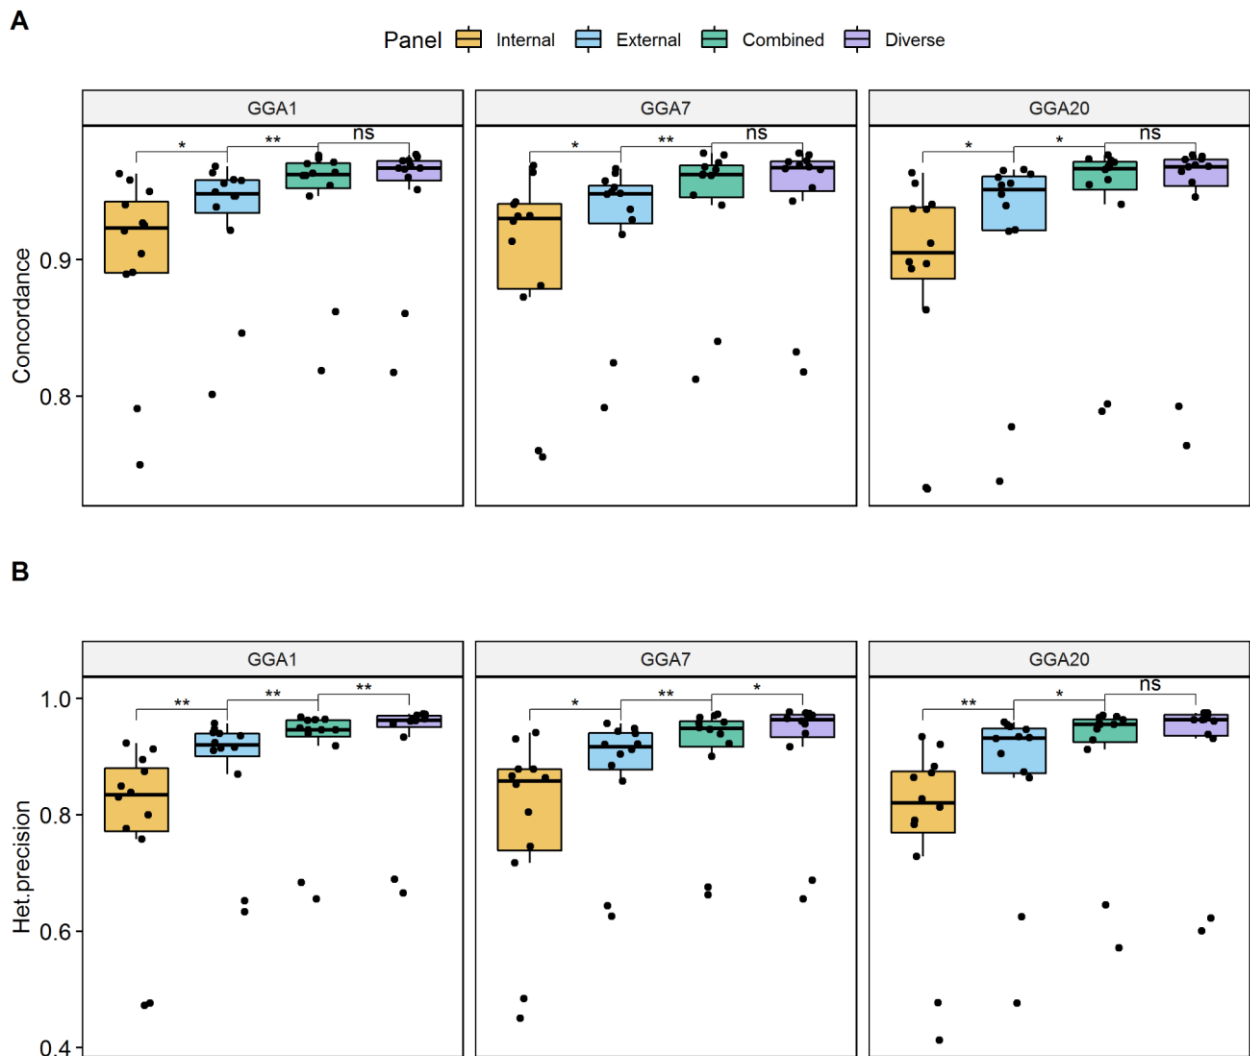

352

353 **Fig 3. LOOCV test results and comparison of imputation reference panels.**

354 (A) Genotype concordance, and (B) precision of heterozygous sites between imputed (low-depth  
355 12 validation samples) and true (internal reference samples) genotypes on chromosomes GGA1,  
356 GGA7 and GAA20. Paired T-tests were performed to identify significant differences in means: the  
357 following symbols ( "\*\*\*", "\*\*", "ns") indicate different p-value cut-points (>0.001, 0.001, 0.05).



358

359 In an attempt to further assess imputation accuracy, we classified variants according to their MAF  
360 in four bins (0-0.05, 0.05-0.1, 0.1-0.3 and >0.3) and calculated precision of het. sites, and the  
361 number of correctly imputed variants for the 12 validation samples for GGA1 (Fig 4). The internal  
362 panel, while recovering the largest number of variants, was also the panel with the lowest  
363 performance in adequately inferring low-frequency variants, especially for the variants with MAF  
364 <0.1 (Fig 4A). Although there was no improvement from the external to the combined panel for the  
365 smallest MAF bin, a substantial improvement was seen for the rest of the bins. Some significant  
366 differences but not as pronounced were also observed from the combined to the diverse.  
367 Therefore, the combined panel showed overall the best results with the highest number of correctly  
368 imputed variants in all MAF bins (Fig 4B), while maintaining a very similar number of imputed SNPs  
369 as the external panel. The diverse panel inferred fewer low-frequency variants, but did so more  
370 effectively (Fig 4).

A

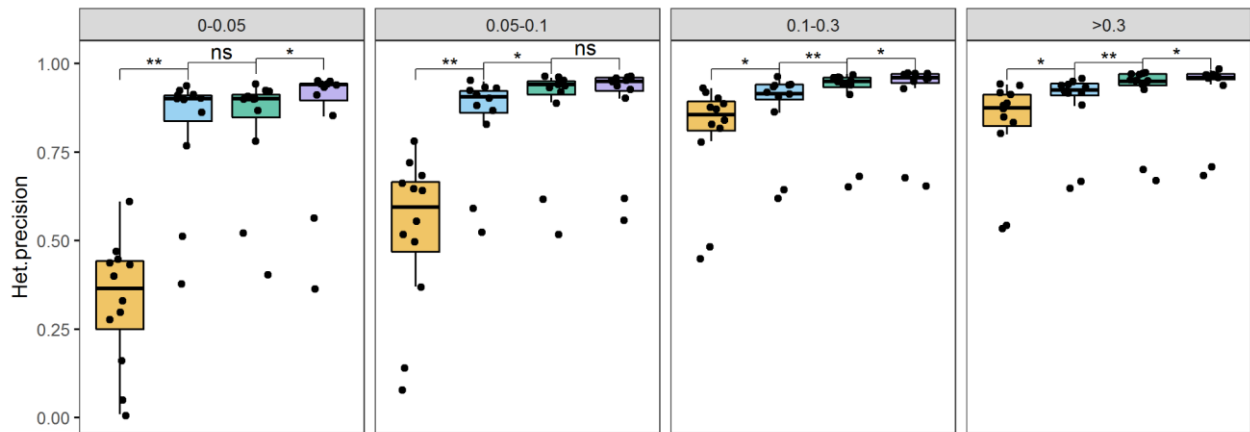

B

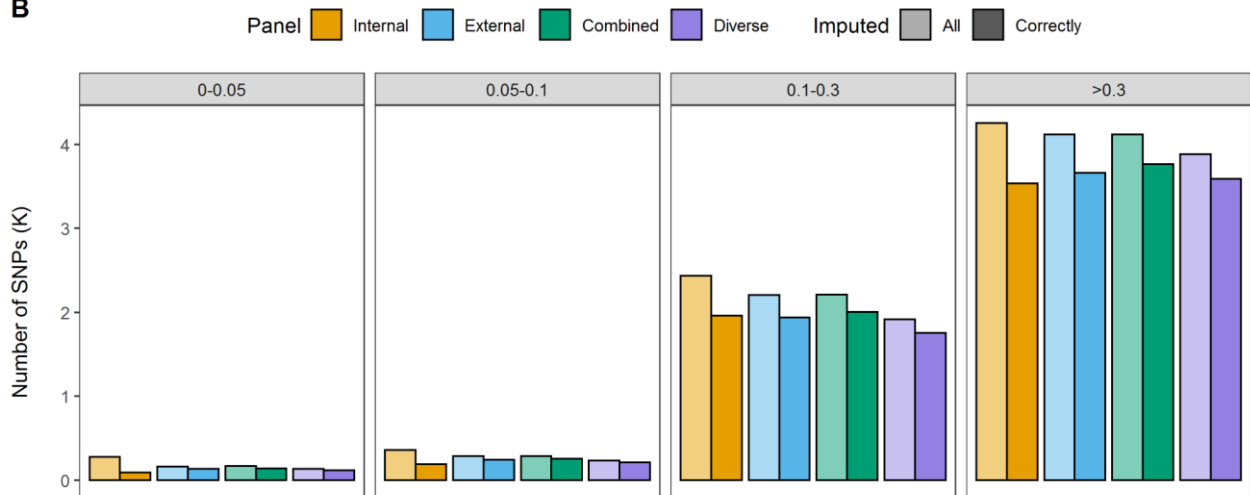

371

372 **Fig 4. Minor allele frequency variants of LOOCV test.**

373 (A) Precision of heterozygous sites and (B) number of imputed low-frequency variants for  
374 chromosome one (GGA1) divided into four different bins of minor allele frequency ranges: 0-0.05,  
375 0.05-0.1, 0.1-0.3 and >0.3. The lower bars represent correctly imputed variants, while the bars with  
376 greater transparency represent the number of all imputed variants within the respective MAF bin.  
377 Variants that coincided between imputed (low-depth 12 validation samples) and true (internal  
378 reference samples) genotypes were considered correctly imputed variants. Paired T-tests were  
379 performed to identify significant differences in means across panels: the following symbols ( "\*\*\*",  
380 "\*\*", "ns") indicate different p-value cut-points (>0.001, 0.001, 0.05).

381

382 Despite the high overall imputation accuracy, the two samples with depths of 0.05x and 0.07x were  
383 outliers that did not achieve a sufficiently high concordance (>0.90) and precision (>0.75) with any  
384 of the panels and chromosomes (Fig 3). They were thus excluded from the target population, and  
385 we refer from now on to 10 validation samples instead of 12.

## 386 **Panel choice impact on population genetic inference**

### 387 **Number of variants and their allele frequency distribution in the imputed** 388 **target population**

389 The final number of SNPs recovered from all autosomal chromosomes in the target population  
390 with different panels decreased as more distant individuals were included (Fig 5A). This was due  
391 to the missing call rate (MCR) filter during the two-step imputation. Using the internal panel, we  
392 recovered 11.7 M filtered SNPs in the target population. These were 30% more recovered variants  
393 than when using the diverse panel (8.9 M). Most of the excess variants from the internal panel are  
394 low-frequency variants that cannot be confidently recovered (Fig 5B), as seen in the less effective  
395 imputation of low-frequency variants with the internal panel (Fig 4A). Both Ross and Cobb  
396 populations showed extreme allele frequencies (peaks at both ends of the distribution, Fig 5B)  
397 revealing a high proportion of fixed or nearly fixed variants in the respective populations. The Ross  
398 population had a higher density of low-frequency variants than Cobb (Fig 5C), indicating a higher  
399 number of fixed variants than in the Cobb population.

400

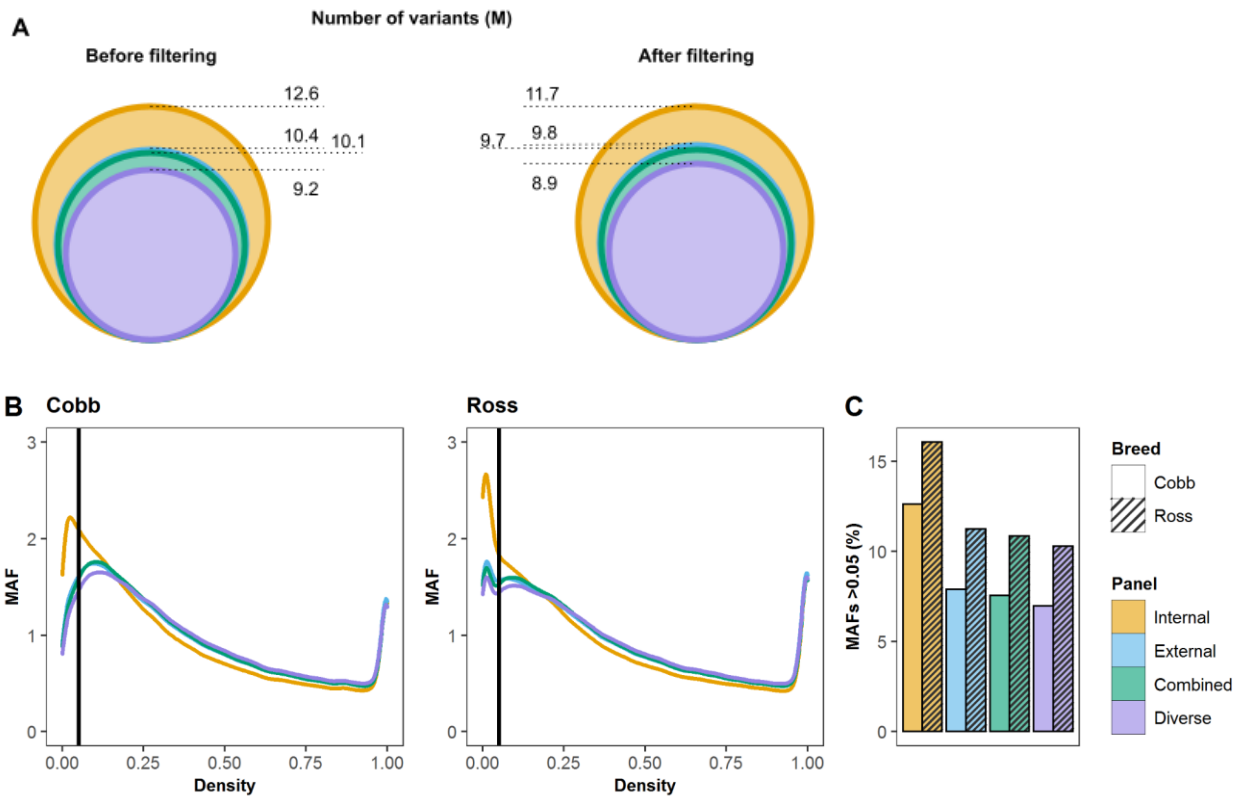

401

402

403 **Fig 5. Imputed variants in the target population and their allele frequencies for all autosomal**  
404 **chromosomes.**

405 (A) Number of variants in the target population when imputed using the different panels. (B) Allele  
406 frequencies of variants imputed in the target population, with a vertical line indicating minor allele  
407 frequency (MAF) 0.05, a standard threshold for quality control filtering in genomic datasets. (C)  
408 Percentage of variants with a MAF lower than 0.05 by breed for all the panels.

409

## 410 Population genetic parameters in the target population

411 In order to explore the effect of panel choice in downstream analyses, we measured five  
412 parameters commonly used in population genetics; namely, observed heterozygosity (O.Het),  
413 nucleotide diversity ( $\pi$ ), fixation index (FST), pairwise distance as measured by 1-identity-by-state  
414 (1-IBS) and kinship.

415

416 Mean O.Het values differed across all panels for both Cobb and Ross (Fig 6a). The values  
417 estimated by imputation tended to increase with panel size and diversity for both breeds. Individual  
418 O.Het percentage values displayed a higher variance when imputed with the internal panel and  
419 tended to equalise across samples with the external, combined and diverse panels, following the  
420 same trend as with the accuracy statistics (Figs 3 and 6A). This high variance displayed by the  
421 internal panel might stem from the fewer correctly imputed variants in the internal panel. For the  
422 Cobb population, none of the panels reached the heterozygosity values seen with the 4 Cobb  
423 individuals (from the high-depth validation samples) (Fig 6A). For Ross, on the contrary, the  
424 external and combined panels showed very similar values to the validation samples, while the  
425 diverse panel overestimated O.Het values. The very same trend can be seen when comparing  
426 imputed and high-depth validation samples (Fig S3). There were some outlier samples (two from  
427 Cobb and one from Ross) that presented lower O.Het than the high-depth validation samples (Fig  
428 6A). These samples apparently underwent an incorrect imputation process, but it was not  
429 necessarily related to a low mapping depth.

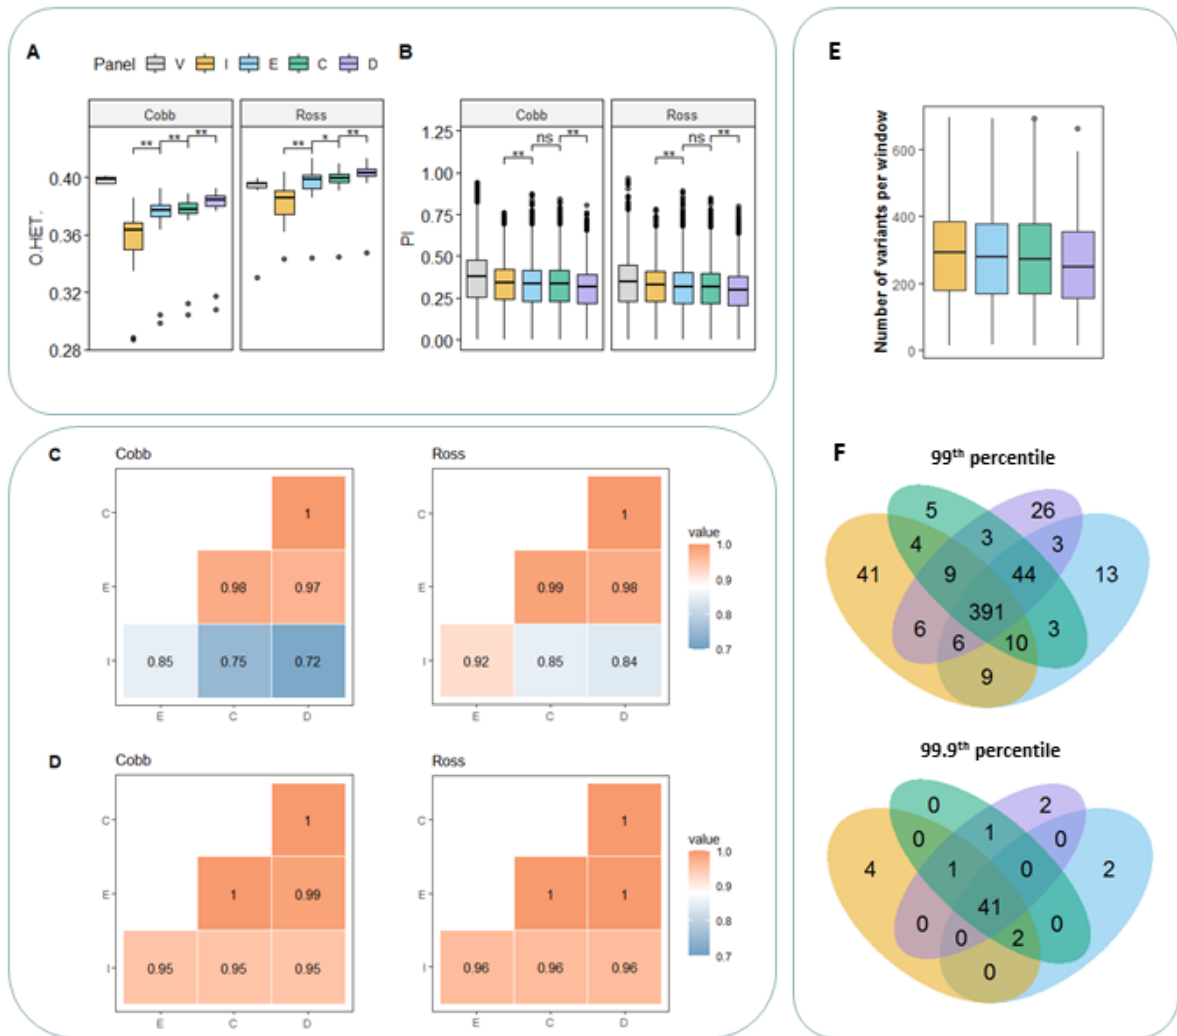

430

431 **Fig 6. Comparison of the choice of reference panels for imputed target population for all**  
 432 **autosomal chromosomes.**

433 (A) Observed heterozygosity for the 10 validation samples (true genotypes) and for the imputed  
 434 target population by breed. Capitalised letters in the legend refer to the following names: I=internal,  
 435 E=external, C=combined D=diverse and V=Validation samples. (B) Nucleotide diversity of the  
 436 target population by breed. Paired T-tests were performed to identify significant differences in  
 437 means: the following symbols ("\*\*\*", "\*\*", "ns") indicate different p-value cut-points (>0.001, 0.001,  
 438 0.05). (C) Kinship and (D) pairwise distance correlation matrices for the target population.  
 439 Capitalised letters in the x and y axes refer to panel names: I=internal, E=external, C=combined  
 440 and D=diverse. (E) Boxplot showing number of variants in the common windows of the 99th and  
 441 99.9th percentiles from the FST genome scan. (F) Venn diagram depicting overlap of significantly  
 442 differentiated windows as estimated by FST genome scans between Cobb and Ross populations

443 using the different panels for imputation. Significance thresholds were set at the 99th and 99.9th  
444 percentiles.

445

446 Nucleotide diversity, on the other side, decreased with increasing panel size and diversity (Fig 6B),  
447 which was directly related to the lower number of variants retained in the external, combined and  
448 diverse panels compared to the internal. There were significant differences in means except  
449 between the external and combined panels for both breeds, most likely because of the similar  
450 number of variants both panels share (Fig 5A). When comparing the imputed population with the  
451 validation samples,  $\pi$  of imputed samples and of the target population were underestimated for all  
452 panels (Figs 6B and S3).

453 Regarding the population genetic interpretation, both populations were very similar, but the  
454 imputation tended to accentuate differences between the two populations (Figs 6 and S4). Within  
455 population pairwise distance and kinship values did not vary much according to the panel. For  
456 pairwise distance, the diverse panel resulted in larger interindividual distances within breeds (Fig  
457 S4). Kinship values were lower when computed with the internal panel, since a larger number of  
458 SNPs were retained, in particular, low-frequency variants which are typically unique to one or few  
459 individuals thus decreasing kinship (Fig S4). Mantel R tests did not show any significant differences  
460 for pairwise distance and kinship matrices, giving the same result for all panel comparisons (Mantel  
461 statistic, p-value < 0.001). Correlation values for pairwise distance were very similar and close to  
462 1 (Fig 6D), even for the validation samples (true genotypes) when compared with any panel (Fig  
463 S3). For kinship instead, it seemed that the internal panel differed more from the rest (Figs S3 and  
464 6C). In both cases, the 10 validation samples were most correlated with samples imputed with the  
465 combined and diverse panels (Fig S3).

466 Whole-genome mean  $F_{ST}$  values between Ross and Cobb populations were very similar (internal  
467 0.071, external 0.071, combined 0.072 and diverse 0.072) indicating overall low differentiation  
468 between the breeds. When analysing the putative selective sweep regions using as threshold the  
469 99th percentile, 68.2% of the windows coincided across the four panels, but more interestingly,

470 75.9% of the windows were shared across the external, combined and diverse panels. When we  
471 raised the threshold to the 99.9th percentile, 77% of windows were identified by the genome-scans  
472 regardless of the choice of panel, indicating that the strongest signals are detected with any panel.  
473 Yet, there were some regions that only passed the threshold when imputation was performed with  
474 a particular panel (Fig 6F). The combined panel did not show specific sweeps when the percentile  
475 was set at 99.9, and it was the panel with the lowest panel-specific regions with the 99th percentile  
476 as well, potentially indicating the most robust results, i.e. without panel-specific biases.  
477 Surprisingly, the diverse panel detected the most panel-specific sweeps after the internal panel  
478 (Fig 6F). On the other side, in terms of density of variants in the common windows, the mean  
479 number of variants reduced significantly from the internal to the diverse panel (Fig 6E). This  
480 suggests that although in a broad sense the same sweep signals can be detected by all panels, a  
481 reduced number of imputed variants might give a smaller chance of detecting causative variants.

## 482 Discussion

483 Shotgun metagenomic datasets of host-associated microbial communities often contain host DNA  
484 that is usually discarded because the amount of data is too low for accurate host genetic analyses.  
485 Here, we introduced an effective and accurate approach to recover high-quality host genomes  
486 from gut metagenomic data, which can be used to study host population genetic analyses and  
487 ultimately contribute to a better understanding of host-microbiota interactions.

488 Our analyses yielded drastic differences in mapping statistics between caecum samples used to  
489 characterise the target population and ileum samples employed to generate the internal reference  
490 panel. Although both sample types derived from gut contents, the caecum harbours a very small  
491 amount of the host DNA compared to the ileum, because the latter is known to contain fewer  
492 bacteria (39), and the higher permeability and a thinner mucus layer of the ileum probably entails  
493 higher release of epithelial cells to the lumen (40). Moreover, the low, yet variable, proportion of  
494 host DNA retrieved from caecum samples renders sequencing depth adjustment highly  
495 unpredictable, as previously reported (7). Notwithstanding, we showed that if a proper reference  
496 panel is designed, the low and variable fractions of host DNA recovered from such suboptimal



497 samples, can be used for accurately inferring host genetic features. It must be noted though, that  
498 the ratio of host and microbial DNA recovered from chicken caecum and ileum samples can not  
499 directly be extrapolated to other host taxa and sample types.

500 The two-step imputation strategy performed efficiently despite the structural (e.g., study design,  
501 animal taxa, reference panel size) differences between our study system and the ones the strategy  
502 was originally designed for (23,24). First, we used custom reference panels with less than one  
503 hundred individuals, while the two-step strategy was originally tested with large reference panels  
504 such as the Human 1000 Genomes (12). Nevertheless, our accuracy values were comparable to  
505 the previous results, most likely because the individuals in our target population were closely  
506 related, as evidenced by the high kinship values. Second, although we had a similar range of target  
507 population sample depths (Hui: from 0.05x to 2x and Homburger: 0.54x to 1.76x), our samples  
508 consisted of real low-depth sequence data, instead of downsampled sequencing reads from high-  
509 depth samples. Thus, mapping gaps across the reference genome were unevenly distributed. This  
510 is evidenced by the large difference between depth (1.8x) and breadth (50%) of coverage (S1  
511 Table), likely hampering accurate computation across the genome. Besides, Hui et al. (2020)  
512 documented that the proportion of correctly imputed heterozygous sites started decreasing at 0.5x  
513 of depth of coverage, reaching 50% of correctly imputed sites at 0.1x. In our system, >90% of the  
514 variants in samples with 0.28-0.5x could be recovered, and accuracy only dropped significantly in  
515 samples below 0.1x. Accordingly, we decided to set a mapping depth threshold at 0.28x, but we  
516 recommend adjusting it depending on the sample size and quality of the data set, as well as the  
517 accuracy needs of each study.

518 The accuracy of low-frequency variants for all panels except for the internal, which showed much  
519 lower values, were comparable to previous works (24), most likely owing to the stringent filtering  
520 criteria applied in our study (MCR = 0). But the overall accuracy and the accuracy of heterozygous  
521 sites depends heavily on variant frequencies, therefore these comparisons should not be decisive.  
522 Finally, unlike humans, avian genomes present macro- and micro-chromosomes and the latter  
523 frequently undergo interchromosomal translocations (41). However, it seems that the possible  
524 interchromosomal translocations of the target population did not affect imputation, since we did not

525 find any significant differences in accuracy between chromosomes, revealing that the strategy  
526 worked equally well for large, mid-sized and small chromosomes with potentially different linkage  
527 patterns.

#### 528 **4.1 Effect of reference panel on accuracy statistics**

529 Reference panel design depends on data availability as well as computational capacity. It is a  
530 common strategy for imputation of inbred populations to resequence a subset of samples with  
531 higher resolution in order to optimise imputation performance (35). Based on previous works, we  
532 estimated that 12 individuals out of 100 would be sufficient to represent the genetic diversity of the  
533 population. For instance, previous chicken studies deep-sequenced 25 individuals to impute  
534 approximately 450 chickens genotyped with 600-K SNP arrays (~5% of sample size) (20,42).

535 In terms of panels SNP density, we decided to genotype variants that did appear in our target  
536 population rather than calling for specific variants in the rest of the breeds that composed the  
537 reference panels. Thereby, we aimed at reducing the noise that the excess of variant density could  
538 cause in the imputation process. Nevertheless, as the genetic distance between the selected and  
539 our breeds is very small (43), we expected them to share many variants, as we evidenced with  
540 preliminary analyses using GGA1 where 72% of variants identified by genotyping or by calling  
541 overlapped in the external panel (Fig S2).

542 The internal panel resulted in a larger variance across samples. SNPs with low MAF had the lowest  
543 accuracy when imputed with the internal panel. Moreover, incorrectly imputed low-frequency  
544 variants can be easily overcome if a strict MAF filter is applied for downstream analysis. Another  
545 possible option is to sequence more individuals of the target population to increase the reference  
546 panel size. Hence, despite the internal panel only representing a small subset of the target  
547 population, and showing lower imputation values than in the external, combined, and diverse  
548 panels, for scientists without access to external reference samples, this approach is equally useful  
549 as overall imputation accuracy was higher than 90% and biological differences were still visible. In  
550 this sense, host resequencing of a small subset of the target population might represent a cost-  
551 efficient option, especially for researchers working with non-model organisms and inbred

552 populations. Thus, our approach could be useful, for example, to study genome features of  
553 endangered populations relying on faecal samples recovered from the environment.

554 Our results showed that the combined panel performed better in terms of overall accuracy, and  
555 specifically of minor allele frequency variants, than the internal and the external panels alone.  
556 Despite the fact that the external and combined panels had the same number of SNPs, including  
557 a subset of individuals from the target population was beneficial. Many studies already mentioned  
558 an improvement for the combined option (44,45). Lastly, the diverse panel showed the highest  
559 values of concordance and het. sites precision, most probably because of the lower number of  
560 SNPs recovered, especially low-frequency variants, which generally yielded lower imputation  
561 accuracies. In terms of imputation of low-frequency variants, the combined panel outperformed the  
562 diverse one, i.e. it correctly imputed a larger number of variants and tended to improve the  
563 precision of het. sites in some MAF bins. A recent large-scale study performed in a Chinese  
564 population showed that a population-specific reference panel worked the best compared to  
565 European reference panels such as 1000G (21). Imputation was greatly improved when the  
566 reference panel contained a fraction of an extra diverse sample, but they obtained a different  
567 pattern when the panel size was fixed (21). Thus, taking into consideration our and previous results  
568 on selection of imputation panels, it can be concluded that increasing panel size and diversity  
569 improves imputation, but a balance has to be found in the composition of the panel. The distance  
570 between the panel and the target population has to be taken into account.

## 571 **4.2 Effect of reference panel on biological inference**

572 Besides crude imputation accuracy statistics, we evaluated the impact of the panels on  
573 downstream population genetic parameters and their biological interpretation. As imputation  
574 accuracies were generally high with our applied pipeline and the stringent filtering approach, we  
575 expected population genetic inferences to follow similarly.

576 Although overall results were in agreement, all the tested parameters showed slight trends  
577 according to the used reference panel. O.Het, pairwise distance and kinship values increased  
578 while mean  $F_{ST}$  and  $\pi$  values decreased with panel size and diversity (Figs 6 and S4). Such

579 biases were related to the composition of the panels and the associated number and distribution  
580 of recovered SNPs.

581 Imputation worked slightly differently for the two breeds, as Ross population estimations were  
582 closer to the true values than for the Cobb population. Thus, accentuating the distance between  
583 both breeds. This is most likely due to a smaller representation of Cobb individuals in the reference  
584 panels, i.e. 5 Cobb and 7 Ross samples constituted the internal reference panel. Secondly, there  
585 were some samples that were incorrectly imputed because of their low O.Het values (Fig 6A). We  
586 do not know if there are individuals with lower heterozygosity in our Cobb and Ross populations.  
587 For instance, there was a Ross individual from the high-depth validation samples with lower O.Het.  
588 Chickens came from two different hatcheries, which might be the reason why some individuals  
589 might have slightly different genetic features. We may have under-represented one of the origins  
590 in the internal reference samples. Thus, it is necessary to be more cautious for the interpretation  
591 of individual genomes. Nevertheless, results appeared to be robust and similar across panels at  
592 the population level. The genome scans yielded overall very consistent results with major  
593 differentiation signals identified by any of the imputed datasets, likely indicative of a true selection  
594 signature between both breeds. However, downstream analyses such genome scans and GWAS  
595 must be performed with caution since this method is sensitive to low-frequency variants quality.

596 Both breeds exhibited extreme minor allele frequencies, indicating that the genetic drift due to  
597 selection in a closed breeding population has a notable effect. Domestication and breeding history  
598 are the two major processes that shape haplotype structure (31,46). Cobb and Ross, together with  
599 other commercial breeds, have much smaller effective population size than other chickens (47).  
600 Broiler breeding methods are described as a pyramid strategy, in which pure, inbred lines are  
601 crossed, then F1 individuals are crossed between each other. In some cases, even a second or a  
602 third cross is performed in F2 and F3 generations before raising them for meat (48). Therefore,  
603 broilers are highly related populations, but at the same time present high heterozygosity values.  
604 Heterozygosity of our studied breeds were much higher O.Het than of local populations (49), but  
605 similar to other broiler breeds (46). Similarly, nucleotide diversity and mean fixation index values  
606 were comparable to those previously reported (31).

## 607 **Conclusions**

608 Our results show that the two-step imputation implemented in this study can be used to  
609 successfully reconstruct genotypes and study population genetic properties of hosts from  
610 suboptimal metagenomic samples. The comparison among reference panels also demonstrated  
611 that this method is versatile and flexible. This approach could be used in many contexts and exploit  
612 different data sources to address a variety of research questions. This includes the possibility of  
613 mining published metagenomic data sets to recover discarded host DNA sequences. In our  
614 particular case, the reconstructed genotypes will be employed in the H2020 project HoloFood to  
615 detect interactions with microbial metagenomic features, and thus implement a hologenomic  
616 approach to improve animal production (50). Because ‘host-contamination’ should no longer be  
617 considered a problem, but an opportunity.

## 618 **Acknowledgments**

619 We would like to thank the partners that were involved in the design and execution of the animal  
620 trials, specially our colleagues Joan Tarradas, Nuria Tous and Enric Esteve from IRTA.

## 621 **References**

- 622 1. Bovo S, Ribani A, Utzeri VJ, Schiavo G, Bertolini F, Fontanesi L. Shotgun metagenomics of  
623 honey DNA: Evaluation of a methodological approach to describe a multi-kingdom honey  
624 bee derived environmental DNA signature. *PLoS One*. 2018 Oct 31;13(10):e0205575.
- 625 2. Yang S, Gao X, Meng J, Zhang A, Zhou Y, Long M, et al. Metagenomic Analysis of Bacteria,  
626 Fungi, Bacteriophages, and Helminths in the Gut of Giant Pandas. *Front Microbiol*. 2018 Jul  
627 31;9:1717.
- 628 3. Blekhman R, Goodrich JK, Huang K, Sun Q, Bukowski R, Bell JT, et al. Host genetic  
629 variation impacts microbiome composition across human body sites. *Genome Biol*. 2015  
630 Sep 15;16:191.
- 631 4. Nyholm L, Koziol A, Marcos S, Botnen AB, Aizpurua O, Gopalakrishnan S, et al. Holo-  
632 Omics: Integrated Host-Microbiota Multi-omics for Basic and Applied Biological Research.  
633 *iScience*. 2020 Aug 21;23(8):101414.
- 634 5. Limborg MT, Alberdi A, Kodama M, Roggenbuck M, Kristiansen K, Gilbert MTP. Applied  
635 Hologenomics: Feasibility and Potential in Aquaculture. *Trends Biotechnol*. 2018

- 636 Mar;36(3):252–64.
- 637 6. Rasmussen JA, Villumsen KR, Duchêne DA, Puetz LC, Delmont TO, Sveier H, et al.  
638 Genome-resolved metagenomics suggests a mutualistic relationship between *Mycoplasma*  
639 and salmonid hosts. *Communications Biology*. 2021 May 14;4(1):1–10.
- 640 7. Alberdi A, Aizpurua O, Gilbert MTP, Bohmann K. Scrutinizing key steps for reliable  
641 metabarcoding of environmental samples. *Methods Ecol Evol*. 2018 Jan;9(1):134–47.
- 642 8. Marchini J, Howie B. Genotype imputation for genome-wide association studies. *Nat Rev*  
643 *Genet*. 2010 Jul;11(7):499–511.
- 644 9. Scott LJ, Mohlke KL, Bonnycastle LL, Willer CJ, Li Y, Duren WL, et al. A genome-wide  
645 association study of type 2 diabetes in Finns detects multiple susceptibility variants.  
646 *Science*. 2007 Jun 1;316(5829):1341–5.
- 647 10. Iso-Touru T, Sahana G, Guldbbrandtsen B, Lund MS, Vilkki J. Genome-wide association  
648 analysis of milk yield traits in Nordic Red Cattle using imputed whole genome sequence  
649 variants. *BMC Genet*. 2016 Mar 22;17:55.
- 650 11. Pértille F, Moreira GCM, Zanella R, Nunes J de R da S, Boschiero C, Rovadoscki GA, et al.  
651 Genome-wide association study for performance traits in chickens using genotype by  
652 sequencing approach. *Sci Rep*. 2017 Feb 9;7:41748.
- 653 12. 1000 Genomes Project Consortium, Abecasis GR, Altshuler D, Auton A, Brooks LD, Durbin  
654 RM, et al. A map of human genome variation from population-scale sequencing. *Nature*.  
655 2010 Oct 28;467(7319):1061–73.
- 656 13. Daetwyler HD, Capitan A, Pausch H, Stothard P, van Binsbergen R, Brøndum RF, et al.  
657 Whole-genome sequencing of 234 bulls facilitates mapping of monogenic and complex traits  
658 in cattle. *Nat Genet*. 2014 Aug;46(8):858–65.
- 659 14. Artigas MS, Wain LV, Miller S, Kheirallah AK, Huffman JE, Ntalla I, et al. Sixteen new lung  
660 function signals identified through 1000 Genomes Project reference panel imputation. *Nat*  
661 *Commun*. 2015 Dec 4;6(1):1–12.
- 662 15. Pausch H, MacLeod IM, Fries R, Emmerling R, Bowman PJ, Daetwyler HD, et al. Evaluation  
663 of the accuracy of imputed sequence variant genotypes and their utility for causal variant  
664 detection in cattle. *Genet Sel Evol*. 2017 Feb 21;49(1):24.
- 665 16. Pistis G, Porcu E, Vrieze SI, Sidore C, Steri M, Danjou F, et al. Rare variant genotype  
666 imputation with thousands of study-specific whole-genome sequences: implications for cost-  
667 effective study designs. *Eur J Hum Genet*. 2015 Jul;23(7):975–83.
- 668 17. Duan Q, Liu EY, Auer PL, Zhang G, Lange EM, Jun G, et al. Imputation of coding variants in  
669 African Americans: better performance using data from the exome sequencing project.  
670 *Bioinformatics*. 2013 Nov 1;29(21):2744–9.
- 671 18. Al Kalaldehy M, Gibson J, Duijvesteijn N, Daetwyler HD, MacLeod I, Moghaddar N, et al.  
672 Using imputed whole-genome sequence data to improve the accuracy of genomic prediction  
673 for parasite resistance in Australian sheep. *Genet Sel Evol*. 2019 Jun 26;51(1):32.
- 674 19. van den Berg S, Vandenplas J, van Eeuwijk FA, Bouwman AC, Lopes MS, Veerkamp RF.  
675 Imputation to whole-genome sequence using multiple pig populations and its use in  
676 genome-wide association studies. *Genet Sel Evol*. 2019 Jan 24;51(1):2.
- 677 20. Huang S, He Y, Ye S, Wang J, Yuan X, Zhang H, et al. Genome-wide association study on  
678 chicken carcass traits using sequence data imputed from SNP array. *J Appl Genet*. 2018  
679 Aug;59(3):335–44.



- 680 21. Bai W-Y, Zhu X-W, Cong P-K, Zhang X-J, Richards JB, Zheng H-F. Genotype imputation  
681 and reference panel: a systematic evaluation on haplotype size and diversity. *Brief Bioinform*  
682 [Internet]. 2019 Nov 6; Available from: <http://dx.doi.org/10.1093/bib/bbz108>
- 683 22. Korcuć P, Arends D, Brockmann GA. Finding the Optimal Imputation Strategy for Small  
684 Cattle Populations. *Front Genet*. 2019 Feb 18;10:52.
- 685 23. Homburger JR, Neben CL, Mishne G, Zhou AY, Kathiresan S, Khera AV. Low coverage  
686 whole genome sequencing enables accurate assessment of common variants and  
687 calculation of genome-wide polygenic scores. *Genome Med*. 2019 Nov 26;11(1):74.
- 688 24. Hui R, D'Atanasio E, Cassidy LM, Scheib CL, Kivisild T. Evaluating genotype imputation  
689 pipeline for ultra-low coverage ancient genomes. *Sci Rep*. 2020 Oct 29;10(1):18542.
- 690 25. Bozzi D, Rasmussen JA, Carøe C, Sveier H, Nordøy K, Gilbert MTP, et al. Salmon gut  
691 microbiota correlates with disease infection status: potential for monitoring health in farmed  
692 animals. *Anim Microbiome*. 2021 Apr 20;3(1):30.
- 693 26. Carøe C, Gopalakrishnan S, Vinner L, Mak SST, Sinding MHS, Samaniego JA, et al. Single-  
694 tube library preparation for degraded DNA. *Methods Ecol Evol*. 2018;9(2):410–9.
- 695 27. Schubert M, Lindgreen S, Orlando L. AdapterRemoval v2: rapid adapter trimming,  
696 identification, and read merging. *BMC Res Notes*. 2016 Feb 12;9:88.
- 697 28. Shen W, Le S, Li Y, Hu F. SeqKit: A Cross-Platform and Ultrafast Toolkit for FASTA/Q File  
698 Manipulation. *PLoS One*. 2016 Oct 5;11(10):e0163962.
- 699 29. Li H, Durbin R. Fast and accurate short read alignment with Burrows–Wheeler transform.  
700 *Bioinformatics* [Internet]. 2009; Available from:  
701 <https://academic.oup.com/bioinformatics/article-abstract/25/14/1754/225615>
- 702 30. Li H, Handsaker B, Wysoker A, Fennell T, Ruan J, Homer N, et al. The Sequence  
703 Alignment/Map format and SAMtools. *Bioinformatics*. 2009 Aug 15;25(16):2078–9.
- 704 31. Qanbari S, Rubin C-J, Maqbool K, Weigend S, Weigend A, Geibel J, et al. Genetics of  
705 adaptation in modern chicken. *PLoS Genet*. 2019 Apr;15(4):e1007989.
- 706 32. Li H. A statistical framework for SNP calling, mutation discovery, association mapping and  
707 population genetical parameter estimation from sequencing data. *Bioinformatics*. 2011 Nov  
708 1;27(21):2987–93.
- 709 33. McKenna A, Hanna M, Banks E, Sivachenko A, Cibulskis K, Kernytsky A, et al. The  
710 Genome Analysis Toolkit: a MapReduce framework for analyzing next-generation DNA  
711 sequencing data. *Genome Res*. 2010 Sep;20(9):1297–303.
- 712 34. Delaneau O, Marchini J, Zagury J-F. A linear complexity phasing method for thousands of  
713 genomes. *Nat Methods*. 2011 Dec 4;9(2):179–81.
- 714 35. Browning BL, Browning SR. Genotype Imputation with Millions of Reference Samples. *Am J*  
715 *Hum Genet*. 2016 Jan 7;98(1):116–26.
- 716 36. Chang CC, Chow CC, Tellier LC, Vattikuti S, Purcell SM, Lee JJ. Second-generation PLINK:  
717 rising to the challenge of larger and richer datasets. *Gigascience*. 2015 Feb 25;4:7.
- 718 37. Dray S, Dufour A-B, Others. The ade4 package: implementing the duality diagram for  
719 ecologists. *J Stat Softw*. 2007;22(4):1–20.
- 720 38. Wilkinson S, Lu ZH, Megens H-J, Archibald AL, Haley C, Jackson IJ, et al. Signatures of  
721 diversifying selection in European pig breeds. *PLoS Genet*. 2013 Apr;9(4):e1003453.

- 722 39. Rychlik I. Composition and Function of Chicken Gut Microbiota. *Animals* [Internet]. 2020;  
723 Available from: <https://www.mdpi.com/2076-2615/10/1/103>
- 724 40. Duangnumsawang Y, Zentek J, Goodarzi Boroojeni F. Development and Functional  
725 Properties of Intestinal Mucus Layer in Poultry. *Front Immunol*. 2021;12:3924.
- 726 41. Perry BW, Schield DR, Adams RH, Castoe TA. Microchromosomes Exhibit Distinct Features  
727 of Vertebrate Chromosome Structure and Function with Underappreciated Ramifications for  
728 Genome Evolution. *Mol Biol Evol*. 2021 Mar 9;38(3):904–10.
- 729 42. Ye S, Yuan X, Lin X, Gao N, Luo Y, Chen Z, et al. Imputation from SNP chip to sequence: a  
730 case study in a Chinese indigenous chicken population. *J Anim Sci Biotechnol*. 2018 Mar  
731 21;9:30.
- 732 43. Qanbari S, Simianer H. Mapping signatures of positive selection in the genome of livestock.  
733 *Livest Sci*. 2014 Aug 1;166:133–43.
- 734 44. Ye S, Yuan X, Huang S, Zhang H, Chen Z, Li J, et al. Comparison of genotype imputation  
735 strategies using a combined reference panel for chicken population. *Animal*. 2019  
736 Jun;13(6):1119–26.
- 737 45. Ye S, Chen Z-T, Zheng R, Diao S, Teng J, Yuan X, et al. New insights from imputed whole-  
738 genome sequence-based genome-wide association analysis and transcriptome analysis:  
739 The genetic mechanisms underlying residual feed intake in chickens. *Front Genet*. 2020 Apr  
740 3;11:243.
- 741 46. Talebi R, Szmatoła T, Mészáros G, Qanbari S. Runs of Homozygosity in Modern Chicken  
742 Revealed by Sequence Data. *G3*. 2020 Dec 3;10(12):4615–23.
- 743 47. Wang M-S, Zhang J-J, Guo X, Li M, Meyer R, Ashari H, et al. Large-scale genomic analysis  
744 reveals the genetic cost of chicken domestication. *BMC Biol*. 2021 Jun 16;19(1):118.
- 745 48. Van Eenennaam AL, Weigel KA, Young AE, Cleveland MA, Dekkers JCM. Applied animal  
746 genomics: results from the field. *Annu Rev Anim Biosci*. 2014 Feb;2:105–39.
- 747 49. Malomane DK, Simianer H, Weigend A, Reimer C, Schmitt AO, Weigend S. The  
748 SYNBREED chicken diversity panel: a global resource to assess chicken diversity at high  
749 genomic resolution. *BMC Genomics*. 2019 May 7;20(1):345.
- 750 50. Alberdi A, Andersen SB, Limborg MT, Dunn RR, Gilbert MTP. Disentangling host–microbiota  
751 complexity through hologenomics. *Nat Rev Genet*. 2021 Oct 21;1–17.

752

## 753 **Supporting information**

754

755 **S1 Fig. Alignment results before and after changing seed length from 19 to 25.** Captures

756 from multiple regions of the GGA1 visualized with Geneious.

757 **S1 Table. Mapping depth and breadth results before and after changing seed length from**

758 **19 to 25.**

759 **S2 Table. Individual mapping depth and breadth values of the target population.**



760 **S2 Fig. Venn diagram of shared variants between the internal reference samples and the**  
761 **variant called 40 broilers of the external panel for GGA1.**

762 **S3 Fig. Comparison of the choice of the reference panel for the imputed 10 validation**  
763 **samples.** (A) Observed heterozygosity, (B) nucleotide diversity and correlation plots for (C)  
764 pairwise distance and (D) kinship were measured to compare imputed and true genotypes of the  
765 validation samples.

766 **S4 Fig. Pairwise distance and kinship heatmap matrices for each of the panels.**
